# Supplementary material
Source: bioRxiv or medRxiv preprint supplement (https://www.medrxiv.org/highwire/filestream/94530/field_highwire_adjunct_files/0/2020.08.15.20175844-1.pdf)
Supplement: Supplementary file [file 2020.08.15.20175844-1.pdf]

## Supplementary Data

**Table S 1: List of Cytokines measured in each study (\* indicates markers selected for meta-analysis)**

| Author (year)     | n (non-severe) | n (severe) | n (Total) | IL-1 $\beta$ | IL-2*       | IL-2R      | IL-4*       | IL-5       | IL-6*       | IL-7      | IL-8       | IL-10*      | IL-12     | IL-17      | TNF- $\alpha$ * | IFN- $\gamma$ * |
|-------------------|----------------|------------|-----------|--------------|-------------|------------|-------------|------------|-------------|-----------|------------|-------------|-----------|------------|-----------------|-----------------|
| Chen, 2020        | 10             | 11         | 21        | ✓            |             | ✓          |             |            | ✓           |           | ✓          | ✓           |           |            | ✓               |                 |
| Feng, 2020        | 94             | 20         | 114       |              | ✓           |            | ✓           |            | ✓           |           |            | ✓           |           |            | ✓               | ✓               |
| He, 2020          | 12             | 16         | 28        |              | ✓           |            | ✓           | ✓          | ✓           |           |            | ✓           |           |            | ✓               | ✓               |
| Lv, 2020          | 115            | 155        | 270       |              | ✓           |            | ✓           |            | ✓           |           |            | ✓           |           |            | ✓               | ✓               |
| Nie, 2020         | 72             | 25         | 97        |              | ✓           |            | ✓           | ✓          | ✓           |           |            | ✓           |           |            | ✓               | ✓               |
| Qin, 2020         | 166            | 286        | 452       | ✓            |             | ✓          |             |            | ✓           |           | ✓          | ✓           |           |            | ✓               |                 |
| Shi, 2020         | 22             | 21         | 43        |              | ✓           |            | ✓           |            | ✓           |           |            | ✓           |           |            | ✓               | ✓               |
| Song, 2020        | 31             | 42         | 73        |              | ✓           |            | ✓           |            | ✓           |           |            | ✓           |           |            | ✓               | ✓               |
| Wan, 2020         | 102            | 21         | 123       |              |             |            | ✓           |            | ✓           |           |            | ✓           |           | ✓          | ✓               | ✓               |
| Wang, 2020        | 55             | 14         | 69        |              | ✓           |            | ✓           |            | ✓           |           |            | ✓           |           |            | ✓               |                 |
| Wei, Su, 2020     | 131            | 98         | 229       |              | ✓           |            | ✓           |            | ✓           |           |            | ✓           |           |            | ✓               | ✓               |
| Xu, 2020          | 80             | 45         | 125       | ✓            |             |            |             |            | ✓           |           |            | ✓           |           |            |                 |                 |
| Zhang, Zhou, 2020 | 44             | 21         | 65        |              | ✓           |            | ✓           |            | ✓           |           |            | ✓           |           |            | ✓               | ✓               |
| Zhang, Wang, 2020 | 29             | 14         | 43        |              | ✓           |            | ✓           |            | ✓           |           |            | ✓           |           |            | ✓               | ✓               |
| Zhang, Yu, 2020   | 93             | 18         | 111       |              | ✓           |            | ✓           |            | ✓           |           |            | ✓           |           |            | ✓               | ✓               |
| Zhao, 2020        | 53             | 18         | 71        | ✓            | ✓           |            | ✓           |            | ✓           | ✓         |            | ✓           | ✓         | ✓          | ✓               | ✓               |
| Zheng, 2020       | 22             | 74         | 96        |              | ✓           |            | ✓           |            | ✓           |           |            | ✓           |           |            | ✓               | ✓               |
| Zhu, 2020         | 111            | 16         | 127       |              | ✓           |            | ✓           |            | ✓           |           |            | ✓           |           |            | ✓               | ✓               |
| <b>Studies</b>    |                |            |           | <b>4</b>     | <b>14</b>   | <b>2</b>   | <b>15</b>   | <b>2</b>   | <b>18</b>   | <b>1</b>  | <b>2</b>   | <b>18</b>   | <b>1</b>  | <b>2</b>   | <b>17</b>       | <b>14</b>       |
| <b>Patients</b>   |                |            |           | <b>669</b>   | <b>1436</b> | <b>473</b> | <b>1559</b> | <b>125</b> | <b>2157</b> | <b>71</b> | <b>473</b> | <b>2157</b> | <b>71</b> | <b>194</b> | <b>2032</b>     | <b>1490</b>     |

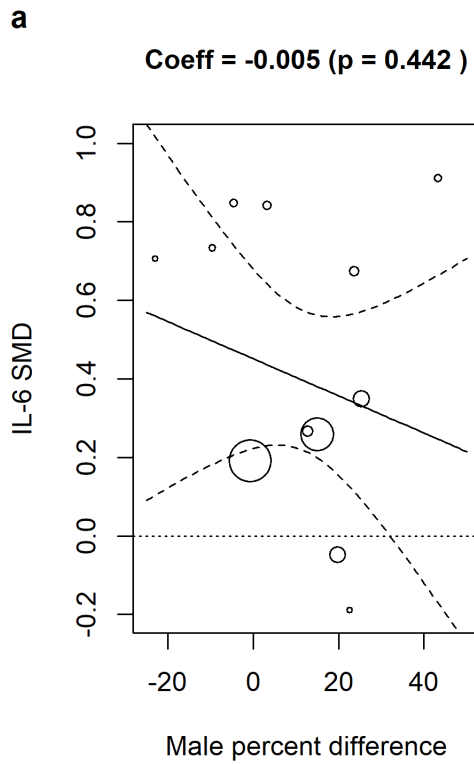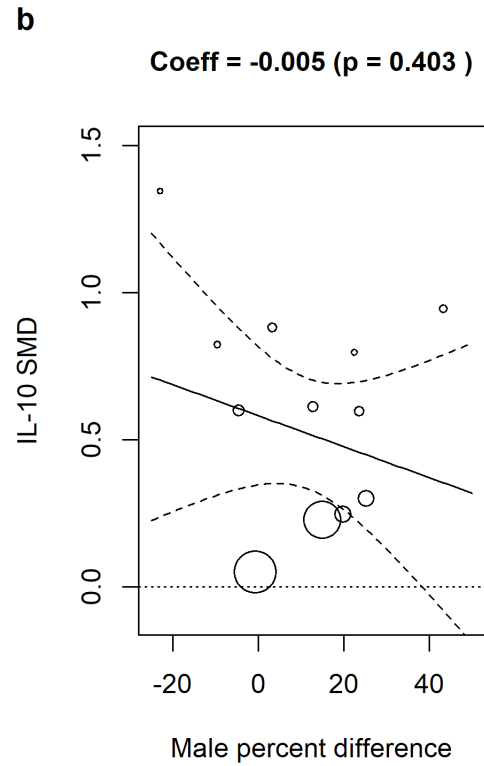

**Figure S 1: Meta-regression bubble plots of (a) IL-6 and (b) IL-10 SMD with percent difference of male patients across severe and non-severe groups**

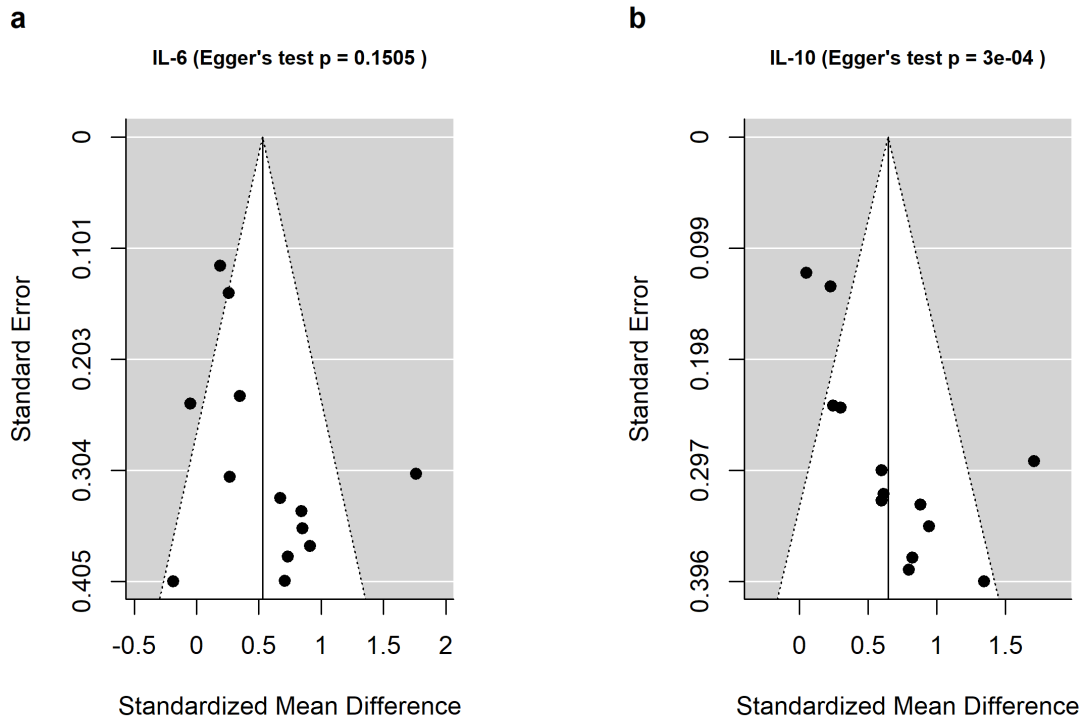

**Figure S 2: Funnel plots depicting publication bias in (a) IL-6 and (b) IL-10 meta-analysis**

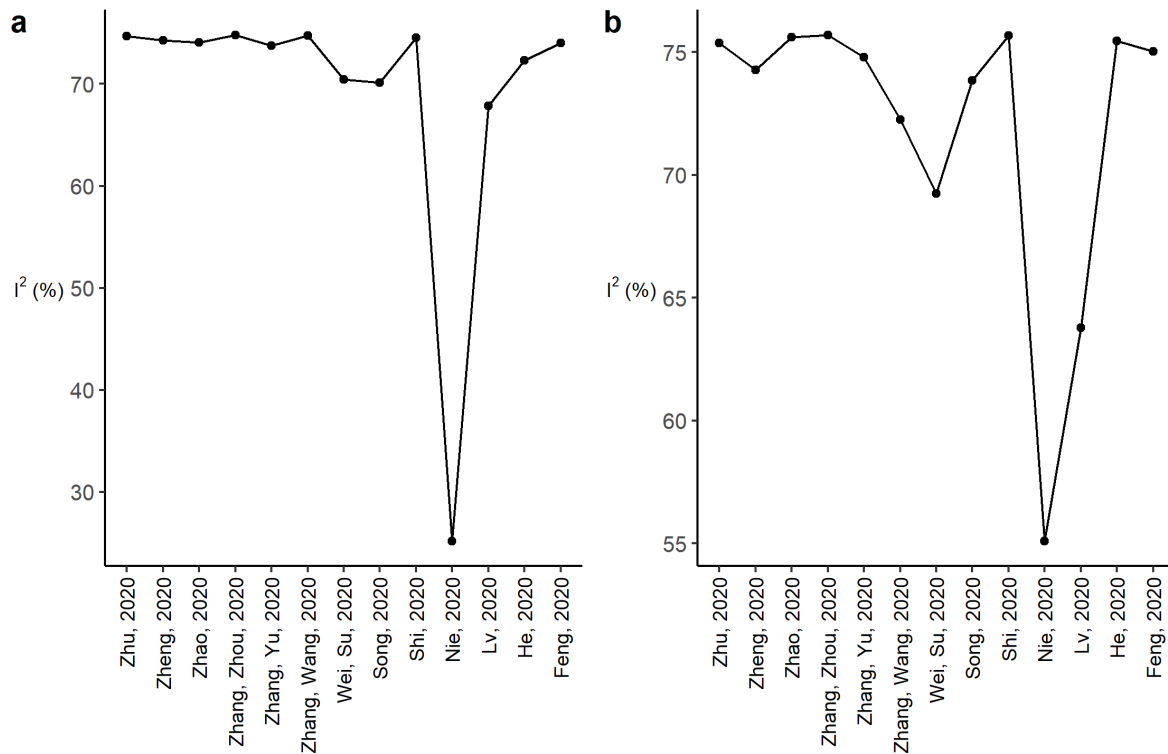

**Figure S 3: Sensitivity analysis for (a) IL-6 and (b) IL-10 meta-analysis**
